# Supplementary material for: Metabolites from Marine Sponges and Their Potential to Treat Malarial Protozoan Parasites Infection: A Systematic Review
Source: MDPI journal article supplement (doi:10.3390/md19030134), 2021-02-28
Supplement: s1 [file s1]

*Review*

**Metabolites from marine sponges and their potential to treat malarial protozoan parasites infection : a systematic review**

**Anna Caroline Campos Aguiar <sup>1</sup>, Julia Parisi <sup>1</sup>, Renata Neves Granito <sup>1</sup>, Lorena Ramos Freitas de Sousa <sup>2</sup>, Ana Cláudia Muniz Renno <sup>1</sup>, Marcos Leoni Gazarini <sup>1\*</sup>**

<sup>1</sup> Department of Biosciences, Federal University of São Paulo (UNIFESP), Rua Silva Jardim, 136, Santos, SP, 11015020, Brazil.

<sup>2</sup> Special Academic Unit of Chemistry, Federal University of Goiás (UFG/UFCAT), Catalão Regional, 75704-020 Catalão, GO, Brazil

\* Correspondence: marcos.gazarini@unifesp.br; Tel.: +5513 3229 0132

Received: date; Accepted: date; Published: date

**Supplementary Table 1:** GRADE analysis of included articles.

| GRADE Factors                   |                                             |               |              |             |                              |             |             |                 |
|---------------------------------|---------------------------------------------|---------------|--------------|-------------|------------------------------|-------------|-------------|-----------------|
| Author                          | Study limitation                            | Inconsistency | Indirectness | Imprecision | Publication bias             | effect size | Dose effect | Overall quality |
| Campos et al., (2019)[14]       | ✓                                           | ✓             | ✓            | ✓           | X: toxicity was not assessed | ✓           | ✓           | +++             |
| Jeong., et al (2019)[15]        | ✓                                           | ✓             | ✓            | ✓           | X: not assessed              | ✓           | ✓           | +++             |
| Ju et al., (2019)[15]           | X: did not report antimalarial control data | ✓             | ✓            | ✓           | ✓                            | ✓           | ✓           | +++             |
| Murtihapsari., et al (2019)[16] | ✓                                           | ✓             | ✓            | ✓           | X: toxicity was not assessed | ✓           | ✓           | +++             |

|                             |   |   |   |   |                                                              |   |   |      |
|-----------------------------|---|---|---|---|--------------------------------------------------------------|---|---|------|
| Parra et al., (2018)[17]    | ✓ | ✓ | ✓ | ✓ | ✓                                                            | ✓ | ✓ | ++++ |
| Campos et al., (2017)[18]   | ✓ | ✓ | ✓ | ✓ | X: all compounds were cytotoxic with low selectivity indices | ✓ | ✓ | +++  |
| Yang et al., (2016)[19]     | ✓ | ✓ | ✓ | ✓ | X: all compounds were cytotoxic with low selectivity indices | ✓ | ✓ | +++  |
| Gros et al., (2015)[20]     | ✓ | ✓ | ✓ | ✓ | X: all compounds were cytotoxic with low selectivity indices | ✓ | ✓ | +++  |
| Chianese et al., (2014)[21] | ✓ | ✓ | ✓ | ✓ | ✓                                                            | ✓ | ✓ | ++++ |
| Gros et al., (2014)[22]     | ✓ | ✓ | ✓ | ✓ | ✓                                                            | ✓ | ✓ | ++++ |
| Yang et al., (2014)[13]     | ✓ | ✓ | ✓ | ✓ | X: all compounds were cytotoxic with low selectivity indices | ✓ | ✓ | +++  |

|                                              |                                                            |   |   |   |                                 |   |   |      |
|----------------------------------------------|------------------------------------------------------------|---|---|---|---------------------------------|---|---|------|
| Alvarado et al.,<br>(2013)[23]               | ✓                                                          | ✓ | ✓ | ✓ | ✓                               | ✓ | ✓ | ++++ |
| Davis et al.,<br>(2013)[24]                  | ✓                                                          | ✓ | ✓ | ✓ | ✓                               | ✓ | ✓ | ++++ |
| Farokhi et al.,<br>(2013)[25]                | ✓                                                          | ✓ | ✓ | ✓ | ✓                               | ✓ | ✓ | ++++ |
| Sirirak et al.,<br>(2013)[26]                | ✓                                                          | ✓ | ✓ | ✓ | X: toxicity was<br>not assessed | ✓ | ✓ | +++  |
| Chanthathamrongsiri et<br>al.,<br>(2012)[27] | ✓                                                          | ✓ | ✓ | ✓ | ✓                               | ✓ | ✓ | ++++ |
| Davis et al.,<br>(2012)[28]                  | ✓                                                          | ✓ | ✓ | ✓ | ✓                               | ✓ | ✓ | ++++ |
| Ilias et al.,<br>(2012)[29]                  | ✓                                                          | ✓ | ✓ | ✓ | ✓                               | ✓ | ✓ | ++++ |
| Mudianta et al.,<br>(2012)[30]               | ✓                                                          | ✓ | ✓ | ✓ | X: toxicity was<br>not assessed | ✓ | ✓ | +++  |
| El Sayed et al.,<br>(2011)[31]               | X: did ✓t report<br>antimalarial control<br>data; does not | ✓ | ✓ | ✓ | ✓                               | ✓ | ✓ | +++  |

|                                   |                                                                                                            |   |   |   |   |   |   |      |
|-----------------------------------|------------------------------------------------------------------------------------------------------------|---|---|---|---|---|---|------|
|                                   | describe the methods used for antiplasmodial evaluation and does not mention appropriate references        |   |   |   |   |   |   |      |
| Galeano et al., (2011)[32]        | X: not describe the methods used for antiplasmodial evaluation and does not mention appropriate references | ✓ | ✓ | ✓ | ✓ | ✓ | ✓ | +++  |
| Sirirak et al., (2011)[33]        | ✓                                                                                                          | ✓ | ✓ | ✓ | ✓ | ✓ | ✓ | ++++ |
| Xu et al., (2011)[34]             | X: not describe the methods used for antiplasmodial evaluation and does not mention appropriate references | ✓ | ✓ | ✓ | ✓ | ✓ | ✓ | +++  |
| Jiménez-Romero et al., (2010)[35] | X: does not describe the methods used for antiplasmodial                                                   | ✓ | ✓ | ✓ | ✓ | ✓ | ✓ | +++  |

|                                 |                                                        |   |   |   |   |   |   |      |
|---------------------------------|--------------------------------------------------------|---|---|---|---|---|---|------|
|                                 | evaluation and does not mention appropriate references |   |   |   |   |   |   |      |
| Samoylenko et al., (2009)[36]   | ✓                                                      | ✓ | ✓ | ✓ | ✓ | ✓ | ✓ | ++++ |
| Ueoka et al., (2009)[37]        | ✓                                                      | ✓ | ✓ | ✓ | ✓ | ✓ | ✓ | ++++ |
| Wright et al., (2009)[38]       | ✓                                                      | ✓ | ✓ | ✓ | ✓ | ✓ | ✓ | ++++ |
| Appenzeller et al., (2008)[39]  | ✓                                                      | ✓ | ✓ | ✓ | ✓ | ✓ | ✓ | ++++ |
| Desoubzdanne et al., (2008)[40] | ✓                                                      | ✓ | ✓ | ✓ | ✓ | ✓ | ✓ | ++++ |
| Tasdemir et al., (2007)[41]     | ✓                                                      | ✓ | ✓ | ✓ | ✓ | ✓ | ✓ | ++++ |
| Laurent et al., (2006)[42]      | X: did not report antimalarial control data            | ✓ | ✓ | ✓ | ✓ | ✓ | ✓ | +++  |
| Mancini et al., (2004)[43]      | ✓                                                      | ✓ | ✓ | ✓ | ✓ | ✓ | ✓ | ++++ |

|                               |                                                                                                                |   |   |   |                              |   |   |      |
|-------------------------------|----------------------------------------------------------------------------------------------------------------|---|---|---|------------------------------|---|---|------|
| Fattorusso et al., (2002)[44] | ✓                                                                                                              | ✓ | ✓ | ✓ | X: toxicity was not assessed | ✓ | ✓ | +++  |
| Gochfeld et al., (2001)[45]   | X:does not describe the methods used for antiplasmodial evaluation and does not mention appropriate references | ✓ | ✓ | ✓ | ✓                            | ✓ | ✓ | +++  |
| Kirsch et al., (2000)[46]     | ✓                                                                                                              | ✓ | ✓ | ✓ | ✓                            | ✓ | ✓ | ++++ |
| Angerhofer et al., (1992)[47] | ✓                                                                                                              | ✓ | ✓ | ✓ | ✓                            | ✓ | ✓ | ++++ |

Grade Factors: ✓: No Serious Limitations; X: Serious Limitations; For Overall Quality of Evidence: +, very low; ++, low; +++, moderate; +++, high.
